# Supplementary material for: Enhancement of Adeno-Associated Virus-Mediated Gene Therapy Using Hydroxychloroquine in Murine and Human Tissues
Source: PubMed Central journal article supplement (PMC6606965; doi:10.1016/j.omtm.2019.05.012), 2019-06-04
Supplement: mmc1.pdf [file mmc1.pdf]

**OMTM, Volume 14**

**Supplemental Information**

**Enhancement of Adeno-Associated Virus-Mediated  
Gene Therapy Using Hydroxychloroquine  
in Murine and Human Tissues**

**Laurel C. Chandler, Alun R. Barnard, Sarah L. Caddy, Maria I. Patrício, Michelle E. McClements, Howell Fu, Cristina Rada, Robert E. MacLaren, and Kanmin Xue**

## Supplemental figures

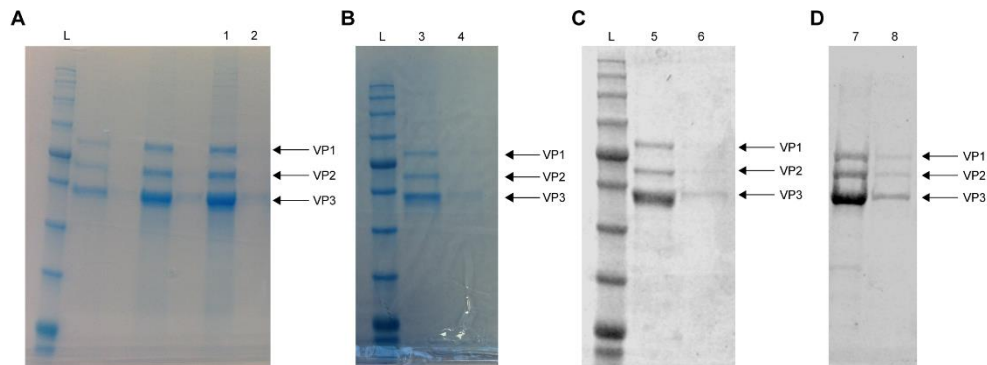

**Fig S1. EZBlue stained SDS-PAGE of AAV vectors to assess purity.** Image of the purified preparation of AAV2.GFP (A) lot #1, (B) lot #2 and (C) lot #3. (D) Purified preparation of AAV8(Y733F).GRK1.GFP, image taken on Odyssey Imaging System (LI-COR Biosciences). The presence of AAV virion protein 1 (VP1), VP2 and VP3 are indicated. Lanes 1, 3 & 5: AAV2.GFP concentrated sample; lanes 2, 4 & 6: AAV2.GFP wash; lane 7: concentrated AAV8(Y733F).GRK1.GFP; lane 8: AAV8(Y733F).GRK1.GFP wash; L: protein ladder.

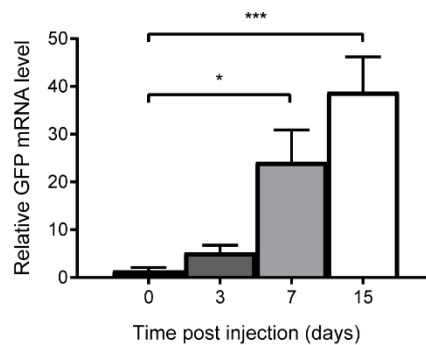

**Fig S2. GFP expression following AAV2.GFP subretinal injection *in vivo*.** Wild-type C57BL/6 mice were subretinally injected with AAV2.GFP ( $1.2 \times 10^8$  gc). RNA was extracted from the mouse retina at baseline (n=5) and on day 3 (n=6), 7 (n=6) and 15 (n=7) post-injection. GFP expression was quantified using RT-qPCR. Relative expression was calculated as a mean fold change ( $\pm$ SEM) relative to the mean of uninjected baseline controls. \* $p \leq 0.05$  and \*\*\* $p \leq 0.001$  (one-way ANOVA with Dunn's multiple comparison test).

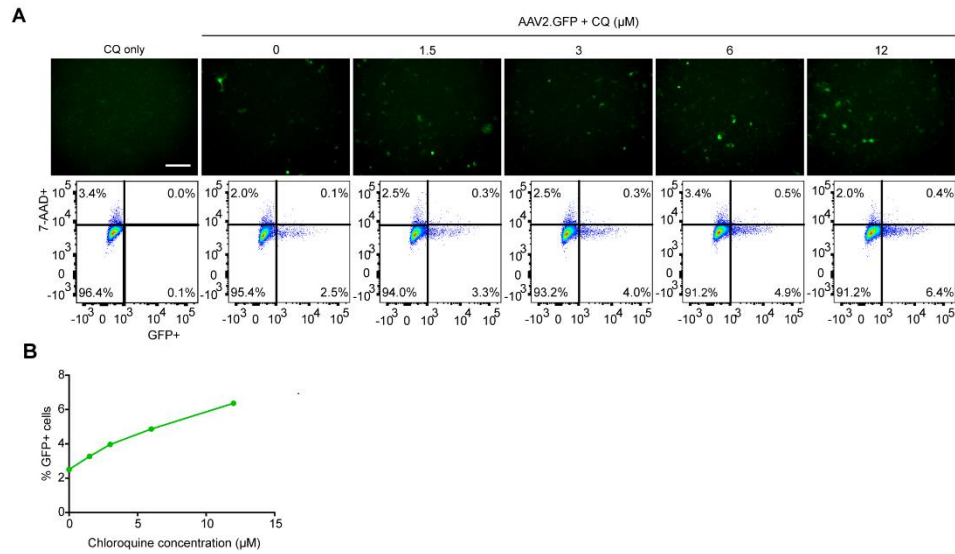

**Fig S3. Chloroquine (CQ) increases AAV transduction in MEFs.** Wild-type MEFs were pre-treated with 0, 1.5, 3, 6 or 12  $\mu\text{M}$  of CQ for 1h prior to transduction with AAV2.GFP at a MOI of 1000. **(A)** Representative fluorescence microscopy images acquired at day 3 post-transduction (scale bar: 200  $\mu\text{m}$ ) shown alongside flow cytometry analyses gated for GFP fluorescence and the cell viability marker, 7-AAD. **(B)** Proportion of GFP positive (GFP+) cells expressed as a percentage of the total number of live (7-AAD negative) cells at day 3 (n=1).

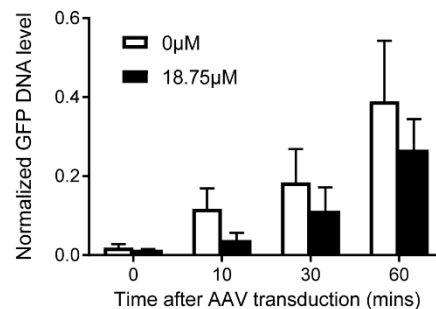

**Fig S4. Effect of HCQ on intracellular AAV genome load post-transduction.** Wild-type MEFs were pre-treated with HCQ for 1h prior to transduction with AAV2.GFP at a MOI of 1000. Cells treated with 0 or 18.75  $\mu\text{M}$  HCQ were harvested at 0, 10, 30 and 60 mins post-transduction. DNA was extracted and *GFP* DNA copy numbers were quantified using qPCR. *GFP* DNA was normalized to *Gapdh* genomic DNA levels ( $\pm\text{SEM}$ , n=3).

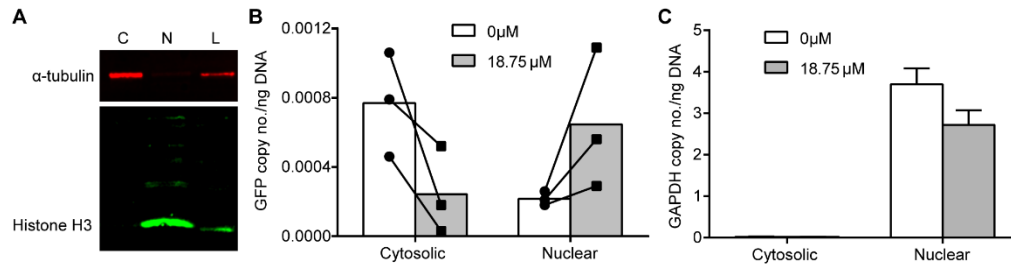

**Fig S5. HCQ influences the subcellular distribution of AAV viral genomes.** Wild-type MEFs were pre-treated with 0 or 18.75  $\mu$ M HCQ for 1h prior to transduction with AAV2.GFP at a MOI of 1000. Cells were harvested 24h post-transduction and DNA was extracted. **(A)** Western blot of  $\alpha$ -tubulin and histone H3 protein expression in cytosolic [C] and nuclear [N] fractions, and unfractionated whole cell lysate [L]. **(B)** Paired data of 0 or 18.75  $\mu$ M HCQ treated samples plotted onto mean *GFP* DNA copy numbers per ng of DNA quantified using qPCR (n=3). **(C)** *Gapdh* genomic DNA levels ( $\pm$ SEM, n=3).
